# Supplementary material
Source: PubMed Central journal article supplement (PMC2907430)
Supplement: NIHMS215352-supplement-03.pdf [file NIHMS215352-supplement-03.pdf]

Supplemental Table S1: The chemical composition of UFP1 and UFP2 in total PM mass

|                                  | UFP1 (Idle)                  |             | UFP2 (UDDS)                  |             |
|----------------------------------|------------------------------|-------------|------------------------------|-------------|
|                                  | Value                        | Uncertainty | Value                        | Uncertainty |
| <i>WSOC and inorganic ions</i>   | <b>mg/g of total PM mass</b> |             | <b>mg/g of total PM mass</b> |             |
| WSOC                             | 43.4                         | 0.3         | 51.5                         | 0.2         |
| Nitrates                         | 10.1                         | 0.6         | 0.7                          | 0.2         |
| Sulfates                         | 1.4                          | 0.9         | 1.3                          | 0.5         |
| Ammonium                         | 1.6                          | 0.4         | 0.2                          | 0.1         |
| <i>PAHs and hopanes</i>          | <b>µg/g of total PM mass</b> |             | <b>µg/g of total PM mass</b> |             |
| Phenanthrene                     | 33.14                        | 6.80        | 15.10                        | 3.17        |
| Pyrene                           | 35.42                        | 7.12        | 70.30                        | 14.07       |
| Benzo(GHI)fluoranthene           | 3.14                         | 0.67        | 29.74                        | 5.95        |
| Cyclopenta(cd)pyrene             | 6.83                         | 1.68        | 26.00                        | 5.24        |
| Benzo(a)anthracene               | 4.03                         | 1.26        | 22.37                        | 4.52        |
| Chrysene                         | 4.63                         | 1.05        | 28.58                        | 5.72        |
| Benzo(b)fluoranthene             | 1.66                         | 1.03        | 19.42                        | 3.94        |
| Benzo(k)fluoranthene             | 2.76                         | 0.60        | 11.70                        | 2.35        |
| Benzo(e)pyrene                   | 3.25                         | 0.98        | 24.31                        | 4.89        |
| Benzo(a)pyrene                   | 3.95                         | 0.93        | 17.11                        | 3.44        |
| Indeno(1,2,3-cd)pyrene           | 1.63                         | 0.58        | 4.34                         | 0.93        |
| Benzo(GHI)perylene               | 2.20                         | 0.74        | 18.28                        | 3.67        |
| 17B(H)-21A(H)-30-Norhopane       | 12.49                        | 2.50        | 20.68                        | 4.14        |
| 17A(H)-21B(H)-Hopane             | 9.28                         | 1.87        | 7.62                         | 1.53        |
| <i>Metals and trace elements</i> | <b>ng/g of total PM mass</b> |             | <b>ng/g of total PM mass</b> |             |
| Na                               | 49648.0                      | 1320.2      | 40325.3                      | 2626.9      |
| Mg                               | 10566.1                      | 595.7       | 13533.8                      | 664.9       |
| Al                               | 1613.6                       | 70.8        | 353.5                        | 383.2       |
| P                                | 574452.4                     | 2824.0      | 258247.4                     | 3681.9      |
| S                                | 211640.4                     | 2169.3      | 326607.0                     | 3751.0      |
| K                                | 23582.8                      | 204.6       | 17607.8                      | 749.6       |
| Ca                               | 233281.8                     | 3024.3      | 987416.5                     | 9763.1      |
| Fe                               | 474.2                        | 948.2       | 2976.1                       | 2107.1      |
| V                                | 76.1                         | 11.0        | 30.4                         | 9.5         |
| Cr                               | 124.4                        | 14.7        | 307.3                        | 39.9        |
| Mn                               | 1008.9                       | 36.9        | 451.6                        | 57.4        |
| Co                               | 13.4                         | 1.3         | 18.2                         | 4.9         |
| Ni                               | 537.9                        | 54.7        | 2182.0                       | 78.5        |
| Cu                               | 71.9                         | 17.2        | 13.6                         | 31.7        |
| Zn                               | 558221.3                     | 12684.6     | 280343.4                     | 3514.2      |
| As                               | 111.4                        | 23.9        | 31.3                         | 31.4        |
| Zr                               | 191.3                        | 21.1        | 281.7                        | 5.9         |
| Nb                               | 1.3                          | 0.5         | 20.9                         | 3.1         |
| Mo                               | 139.1                        | 33.2        | 718.1                        | 77.5        |
| Pd                               | 15.3                         | 1.8         | 7.9                          | 3.0         |
| Ag                               | 22.6                         | 4.9         | 69.1                         | 6.8         |
| Cd                               | 53.8                         | 7.5         | 3.1                          | 2.0         |
| Cs                               | 137.8                        | 5.5         | 0.5                          | 0.1         |
| Ba                               | 747.9                        | 36.1        | 752.6                        | 64.4        |
| La                               | 3.2                          | 0.1         | 2.5                          | 0.4         |
| Ce                               | 3.9                          | 0.7         | 2.7                          | 0.9         |
| Nd                               | 1.5                          | 1.0         | 0.8                          | 0.9         |
| Pt                               | 1.3                          | 1.1         | 2.1                          | 2.4         |
| Pb                               | 786.1                        | 21.1        | 22.5                         | 6.0         |
